# Supplementary material
Source: ML conference proceedings conference paper supplement (https://openreview.net/forum?id=ZVi81SH1Ob)
Supplement: supplementary_material [file attachment]

## A PROOFS OF SECTION 3.1

### A.1 PROOF OF THEOREM 2 AND CORRESPONDING RESULTS

Recall an ETF defined by

$$M = \sqrt{\frac{K}{K-1}} P \left( I_K - \frac{1}{K} \mathbf{1}_K \mathbf{1}_K^T \right) = \sqrt{\frac{K}{K-1}} \left( P - \frac{1}{K} \sum_{k=1}^K P_k \mathbf{1}_K^T \right),$$

where  $P = [P_1, \dots, P_K] \in \mathbb{R}^{p \times K}$  is a partial orthogonal matrix with  $P^T P = I_K$ . Rewrite  $M = [M_1, \dots, M_K]$ . Let the label  $y = (y_1, \dots, y_K)^T \in \{0, 1\}^K$  be represented by the one-hot encoding, that is,  $y_k = 1$  and  $y_j = 0$  for  $j \neq k$  if  $y$  belongs to the  $k$ -th class.

**Definition 6** (Classification problem under Neural Collapse). *Let there be  $K$  classes. The distribution  $\mathbb{P}[x = M_k | y_k = 1] = 1$  for  $k = 1, \dots, K$ .*

*Proof of Theorem 2* Let  $W = [W_1, \dots, W_K]^T \in \mathbb{R}^{K \times p}$ . Consider the output function  $f_W(x) = Wx \in \mathbb{R}^K$ . Suppose that  $y_k = 1$ . Then, the cross-entropy loss is defined by

$$\ell(f_W(x), y) = -\log \left( \frac{e^{W_k^T x}}{\sum_{k'=1}^K e^{W_{k'}^T x}} \right).$$

The corresponding empirical risk is

$$R_n(M, W) = \sum_{k=1}^K -n_k \log \left( \frac{e^{W_k^T M_k}}{\sum_{k'=1}^K e^{W_{k'}^T M_k}} \right).$$

Note that

$$\nabla_W \ell(f_W(x), y) = (\text{SoftMax}(f_W(x)) - y) x^T,$$

where  $\text{SoftMax} : \mathbb{R}^K \rightarrow \mathbb{R}^K$  is the SoftMax function defined by

$$\text{SoftMax}(z)_i = \frac{e^{z_i}}{\sum_{j=1}^K e^{z_j}}, \quad \text{for all } z \in \mathbb{R}^K.$$

We obtain

$$\nabla_W R_n(M, W) = \sum_{k=1}^K n_k (\text{SoftMax}(f_W(M_k)) - y^k) M_k^T,$$

where  $y^k$  is the label of the  $k$ -th class. For zero initialization, we have

$$\text{SoftMax}(f_0(M_k)) = \frac{1}{K} \mathbf{1}_K$$

and

$$\nabla_W (R_n(M, W)) \Big|_{W=0} = \sum_{k=1}^K n_k \left( \frac{1}{K} \mathbf{1}_K - y^k \right) M_k^T. \quad (2)$$

Now we consider one step NoisyGD from 0 with learning rate  $\eta = 1$ :

$$\widehat{W} = - \sum_{k=1}^K n_k \left( \frac{1}{K} \mathbf{1}_K - y^k \right) M_k^T + \Xi,$$

where  $\Xi \in \mathbb{R}^{K \times p}$  with  $\Xi_{ij}$  drawn independently from a normal distribution  $\mathcal{N}(0, \sigma^2)$ .

Consider  $x = M_k$ . It holds

$$f_{\widehat{W}}(x) = \widehat{W} M_k = - \sum_{k'=1}^K n_{k'} \left( \frac{1}{K} \mathbf{1}_K - y^{k'} \right) M_{k'}^T M_k + \Xi M_k.$$

Since

$$\Xi M_k \sim \mathcal{N}(0, \sigma^2 \|M_k\|_2^2 I_K) \quad \text{and} \quad \|M_k\|_2^2 = 1$$

we have

$$\widehat{W} M_k \sim \mathcal{N}(\boldsymbol{\mu}_{n,K}, \sigma^2 I_K),$$

where  $\boldsymbol{\mu}_{n,K} = -\sum_{k'=1}^K n_{k'} \left(\frac{1}{K} \mathbf{1}_K - y^{k'}\right) M_{k'}^T M_k$ . Note that

$$M_{k'}^T M_k = \frac{K}{K-1} \left(\delta_{k,k'} - \frac{1}{K}\right).$$

We obtain

$$(\boldsymbol{\mu}_{n,K})_j = \begin{cases} n/K, & j = k, \\ -\frac{n(K-2)}{K^2(K-1)}, & j \neq k, \end{cases}$$

for  $n_{k'} = n/K$  (balanced data). By the union bound, the mis-classification error is

$$(K-1) \mathbb{P} \left[ \mathcal{N}(n/K, \sigma^2) < \mathcal{N}\left(-\frac{n(K-2)}{K^2(K-1)}, \sigma^2\right) \right] = (K-1) \Phi \left( -\frac{n}{K\sigma} \left(1 + \frac{K-2}{K(K-1)}\right) \right)$$

□

**Proof sketches of the insights.** Note that in Equation equation 2 the gradient is a linear function of the feature map thanks to the zero-initialization while for least-squares loss, one can derive a similar gradient as Equation equation 2. Thus, the proof can be extended to the least squares loss directly. Moreover, by replacing  $n_k$  with  $n_k \eta$  in equation 2 one can extend the results to any  $\eta$ .

## A.2 PROOF OF THEOREM 3

Recall the re-parameterization for  $K = 2$ . Precisely, an equivalent neural collapse case gives  $M = [-e_1, e_1]$  with  $e_1 = [1, 0, \dots, 0]^T$ . Furthermore, we consider the re-parameterization with  $y \in \{-1, 1\}$ ,  $\theta \in \mathbb{R}^p$  and the decision rule being  $\hat{y} = \text{sign}(\theta^T x)$ . Then, the logistic loss is  $\log(1 + e^{-y \cdot \theta^T x})$ .

*Proof of Theorem 3* According to the re-parameterization, for the class imbalanced case, we have

$$\hat{\theta} = -\eta \left( \frac{n}{2} \cdot 0.5 \cdot \begin{pmatrix} -1 \\ 0 \\ \vdots \\ 0 \end{pmatrix} + \frac{n}{2} \cdot 0.5 \cdot \begin{pmatrix} 1 \\ 0 \\ \vdots \\ 0 \end{pmatrix} + \mathcal{N}(0, \frac{G^2}{2\rho} I_p) \right) = -\eta \left( \begin{pmatrix} n/2 \\ 0 \\ \vdots \\ 0 \end{pmatrix} + \mathcal{N}(0, \frac{G^2}{2\rho} I_p) \right).$$

The rest of the proof is similar to that of Theorem 2

For the class-imbalanced case, assume that we have  $\alpha n$  data points have with label +1 while the rest  $(1 - \alpha)n$  points have label -1. Then, the gradient is

$$\hat{\theta} = -\eta \left( \frac{n\alpha}{2} \cdot \begin{pmatrix} -1 \\ 0 \\ \vdots \\ 0 \end{pmatrix} + \frac{n(1-\alpha)}{2} \cdot \begin{pmatrix} 1 \\ 0 \\ \vdots \\ 0 \end{pmatrix} + \mathcal{N}(0, \frac{G^2}{2\rho} I_p) \right) = -\eta \left( \begin{pmatrix} n/2 \\ 0 \\ \vdots \\ 0 \end{pmatrix} + \mathcal{N}(0, \frac{G^2}{2\rho} I_p) \right).$$

Thus, the same conclusion holds.

□

### A.3 PROOF OF THEOREM 4

In this section, we consider a broad pre-training on a gigantic dataset with  $K_0$  classes. The downstream task is a  $K$ -class classification problem with  $K \leq K_0$ . Let  $P = [P_1, \dots, P_{K_0}] \in \mathbb{R}^{p \times K_0}$  be a partial orthogonal matrix with  $P^T P = I_{K_0}$ . Let

$$M_0 = \sqrt{\frac{K_0}{K_0 - 1}} P \left( I_{K_0} - \frac{1}{K_0} \mathbf{1}_{K_0} \mathbf{1}_{K_0}^T \right) = \sqrt{\frac{K_0}{K_0 - 1}} \left( P - \frac{1}{K_0} \sum_{k=1}^{K_0} P_k \mathbf{1}_{K_0}^T \right).$$

Denote  $M = [M_1, \dots, M_K]$  with each  $M_k$  being a column of  $M_0$ . Note that

$$M_{k'}^T M_k = \frac{K_0}{K_0 - 1} \left( \delta_{k,k'} - \frac{1}{K_0} \right).$$

We have

$$\mu_{n,K} := - \sum_{k'=1}^K n_{k'} \left( \frac{1}{K} \mathbf{1}_K - y^{k'} \right) M_{k'}^T M_k.$$

For  $j \neq k$ , we have

$$(\mu_{n,K})_j = -\frac{n}{K} \left[ \frac{1}{K} + \frac{K-1}{K(K_0-1)} - \frac{K-2}{K(K_0-1)} \right] = -\frac{n(K_0-2)}{K^2(K_0-1)}.$$

For  $j = k$ , it holds

$$(\mu_{n,K})_j = -\frac{n}{K} \left[ \frac{1}{K} - 1 - \frac{K-1}{K(K_0-1)} \right] = \frac{n(K-1)K_0}{K^2(K_0-1)}.$$

By the union bound, the mis-classification error is

$$(K-1) \mathbb{P} \left[ \mathcal{N}((\mu_{n,K})_k, \sigma^2) < \mathcal{N}((\mu_{n,K})_1, \sigma^2) \right] = (K-1) \Phi \left( \frac{n C_{K,K_0}}{\sigma} \right)$$

with  $C_{K,K_0} = \frac{1}{K} \left[ \frac{K \cdot K_0 - 2}{K^2(K_0 - 1)} \right]$ .

## B RESULTS FOR PERTURBING THE TESTING DATA

### B.1 FIXED PERTURBATION

Recall that the output of DP-GD has the form  $\hat{\theta} = \mathcal{N}(-\frac{m}{2}, \sigma^2)$ . One has

$$\hat{\theta}^T(e+v) = \frac{n}{2} + \mathcal{N}\left(0, \frac{G^2(p\epsilon^2 + 1)}{2\rho}\right).$$

The sample complexity can be derived similarly as previous sections, which is dimension dependent.

### B.2 RANDOM PERTURBATION

Let's say in prediction time, the input data point can be perturbed by a small value in  $\ell_\infty$ . If we allow the perturbation to be adversarial chosen, then there exists  $v$  satisfying  $\|v\|_\infty \leq \beta$  such that

$$\hat{\theta}^T(x+v) = \frac{n}{2} + \frac{G}{\sqrt{2\rho}} Z_1 - \sum_{i=1}^p |Z_i| \frac{G\beta}{\sqrt{2\rho}}$$

where  $Z_1, \dots, Z_n \sim \mathcal{N}(0, 1)$  i.i.d. Note that the additional term scales as  $O(p \frac{G\beta}{\sqrt{\rho}})$ , which can alter the prediction if  $p \asymp n$  even if  $\rho$  is a constant (weak privacy).

The number of data points needed to achieve  $1 - \delta$  robust classification under neural collapse is  $O\left(\frac{G \max\{p\epsilon, 1\} \sqrt{\log(1/\delta)}}{\sqrt{2\rho}}\right)$ .

## C RESULTS FOR PERTURBING THE TRAINING DATA

### C.1 FIXED PERTURBATION

Without loss of generality, we assume  $0 < \alpha < 1/2$ . Consider the class imbalanced case with  $n_{-1} = \alpha n$  and  $n_{+1} = (1 - \alpha)n$ . The gradient for  $\theta_0 = 0$  is

$$\nabla \mathcal{L}(\theta_0) = \alpha n \cdot 0.5 \cdot -(-e_1 + v) + (1 - \alpha)n \cdot 0.5 \cdot (e_1 + v) = \frac{n}{2}e_1 + \frac{(1 - 2\alpha)n}{2}v.$$

Thus, the output is

$$\hat{\theta} = -\eta \left( \frac{n}{2}e_1 + \frac{(1 - 2\alpha)n}{2}v + \mathcal{N}(0, \sigma^2) \right)$$

The sensitivity is  $G = \sqrt{1 + \|v\|_2}$  and  $\sigma^2$  is taken to be  $G^2/2\rho$  to achieve  $\rho$ -zCDP. Moreover, we have

$$\hat{\theta}^T e_1 = -\frac{n}{2} - \frac{(1 - 2\alpha)n}{2}v_1 + \mathcal{N}(0, \sigma^2).$$

Thus, the mis-classification error is

$$\mathbb{P}[\hat{\theta}^T e_1 > 0] = \Phi \left( \frac{n[1 - (1 - 2\alpha)v_1]}{2\sigma} \right) \leq e^{-\frac{n^2(1 - \beta + 2\alpha\beta)^2\rho}{4G^2}}.$$

As a result, the sample complexity to achieve  $1 - \gamma$  accuracy is

$$n = O \left( \sqrt{\frac{4G^2 \log \frac{1}{\delta}}{(1 - \beta + 2\alpha\beta)^2 \cdot \rho}} \right)$$

The sensitivity  $G = \sqrt{1 + \epsilon^2 p}$  here is dimension-dependent.

### C.2 RANDOM PERTURBATION

Now we consider the random perturbation. Denote  $\{v_i\}_{i=1}^n \subseteq \mathbb{R}^p$  a sequence of i.i.d. copies of a random vector  $v$ . Consider the binary classification problem with training set  $\{(x_i, y_i)\}_{i=1}^n$ . Here  $x_i = e_1 + v_i$  if  $y_i = 1$  and  $x_i = -e_1 + v_i$  if  $y_i = -1$ . Then, the loss function is  $\mathcal{L}(\theta) = \frac{1}{n} \sum_{i=1}^n \log \left( 1 + e^{-y_i \theta^T x_i} \right)$ . The one-step iterate of DP-GD from 0 outputs

$$\hat{\theta} = -\eta \sum_{i=1}^n (-y_i x_i) + \mathcal{N}(0, \sigma^2 I_p)$$

with  $\sigma^2 = G^2/2\rho$  and  $G = \sup_{v_i} \sqrt{1 + \|v_i\|_2}$ . Assume that  $v_i$  is symmetric, that is  $y_i v_i$  has the same distribution as  $-y_i v_i$ . Then, it holds

$$\sum_{i=1}^n y_i x_i = n e_1 + \sum_{i=1}^n v_i =: \mu_n.$$

The mis-classification error is now given by

$$\mathbb{P}[\hat{\theta}^T e_1 < 0] = \mathbb{P}[\mathcal{N}(\mu_n^T e_1, \sigma^2) < 0].$$

Assume that  $\|v_i\|_\infty = \epsilon < 1$ . Then, we have  $\mu_n^T e_1 \geq n - \epsilon n$  and the sample complexity is  $O \left( \sqrt{\frac{4G^2 \log(1/\delta)}{(1 - \epsilon)^2 \rho}} \right)$ . with  $G = \sqrt{1 + \epsilon^2 p}$ .

## D REMEDY TO NON-ROBUSTNESS

### D.1 DETAILS OF THE NORMALIZATION

Consider the case where the feature is shifted by a constant offset  $v$ . The feature of the  $k$ -th class is

$$\tilde{x}_i = x_i - \frac{1}{n} \sum_{i=1}^n x_i = \tilde{M}_k = M_k + v$$

with  $M_k$  being the  $k$ -th column of the ETF  $M$ .

The offset  $v$  can be canceled out by considering the differences between the features. That is, we train with the feature  $\tilde{M}_k - \frac{1}{K} \sum_{j=1}^K \tilde{M}_j$  for the  $k$ -th class. In fact, let  $P_k$  be the  $k$ -th column of  $P$  and we have

$$\begin{aligned} \tilde{M}_k - \frac{1}{K} \sum_{j=1}^K \tilde{M}_j &= M_k - \frac{1}{K} \sum_{j=1}^K M_j \\ &= \sqrt{\frac{K}{K-1}} \left[ \left( P_k - \frac{1}{K} \sum_{i=1}^K P_i \right) - \frac{1}{K} \sum_{j=1}^K \left( P_j - \frac{1}{K} \sum_{i=1}^K P_i \right) \right] \\ &= \sqrt{\frac{K}{K-1}} \left( P_k - \frac{1}{K} \sum_{j=1}^K P_j \right) = M_k. \end{aligned}$$

### D.2 PROOF OF THEOREM 5

*Proof of Theorem 5* Consider the case with  $K = 2$  and a projection vector  $\hat{P} = (e_1 + \Delta)$  with some perturbation  $\Delta = (\Delta_1, \dots, \Delta_p)$  such that  $\|\Delta\|_\infty \leq \beta_0$  for some  $0 < \beta_0 \ll p$ .  $\hat{P}$  can be generated by the pre-training dataset or the testing dataset. Consider training with features  $\tilde{x}_i = \hat{P}x_i$ . Then, the sensitivity of the NoisyGD is  $G = \sup_v |\hat{P}^T(e_1 + v)| = 1 + \beta + \beta|\Delta_1| + \beta(\sum_{j=1}^p |\Delta_j|) \leq 1 + \beta(1 + \beta_0 + p\beta_0)$ . The output of Noisy-GD is then given by

$$\hat{\theta} = -\hat{P} \cdot \left( \sum_{i=1}^n y_i \tilde{x}_i \right) + \mathcal{N}(0, \sigma^2).$$

Moreover, for any testing data point  $e_1 + v$ , define

$$\hat{\mu}_n = - \left( \sum_{i=1}^n y_i \tilde{x}_i \right) \hat{P}^T (e_1 + v) = (e_1 + V)^T \hat{P} \hat{P}^T (e_1 + v)$$

with  $V = \frac{1}{n} \sum_{i=1}^n v_i =: (V_1, \dots, V_p)$ .

We now divide  $\hat{\mu}_n$  into four terms and bound each term separately.

For the first term  $e_1^T \hat{P} \hat{P}^T e_1$ , it holds

$$e_1^T \hat{P} \hat{P}^T e_1 = (1 + e_1^T \Delta_1)^2 \leq (1 - \beta_0)^2.$$

For the second term  $V^T \hat{P} \hat{P}^T e_1$ , we have

$$V^T \hat{P} \hat{P}^T e_1 = V_1 + V^T \Delta$$

Note that  $V_1$  is the average of  $n$  i.i.d. random variables bounded by  $\beta$ . By Hoeffding's inequality, we obtain

$$|V_1| \leq \frac{\beta \log \frac{2}{\gamma}}{\sqrt{n}}, \text{ with probability at least } 1 - \gamma.$$

Similarly, with confidence  $1 - \gamma$ , it holds

$$|V^T \Delta| \leq \frac{p\beta\beta_0 \log \frac{2}{\gamma}}{\sqrt{n}}.$$

The third term  $e_1^T \widehat{P} \widehat{P}^T v$  can be bounded as

$$|e_1^T \widehat{P} \widehat{P}^T v| = (1 + \Delta_1) \left( \sum_{j=1}^p v_j (1 + \Delta_j) \right) \leq (1 + \beta_0) \left( \beta + \beta_0 \sqrt{p \log \frac{2}{\gamma}} \right),$$

where the last inequality is a result of the Hoeffding's inequality by assuming that each coordinate of  $v$  are independent of each others. Moreover, without further assumptions on the independence of each coordinate of  $v$ , we have

$$|e_1^T \widehat{P} \widehat{P}^T v| = (1 + \Delta_1) \left( \sum_{j=1}^p v_j (1 + \Delta_j) \right) \leq (1 + \beta_0) (\beta + \beta_0 p).$$

Using the Hoeffding's inequality again, for the last term  $V^T \widehat{P} \widehat{P}^T (e_1 + v)$ , it holds

$$|V^T \widehat{P} \widehat{P}^T (e_1 + v)| \leq \frac{(\beta + \beta_0 \sqrt{p})(1 + \beta + \beta_0 + \beta \beta_0 \sqrt{p}) \log \frac{4}{\gamma}}{\sqrt{n}}$$

with confidence  $1 - \gamma$  if we assume that all coordinates of  $v$  are independent of each other. Without further assumptions on the independence of each coordinate of  $v$ , we have

$$|V^T \widehat{P} \widehat{P}^T (e_1 + v)| \leq \frac{(\beta + \beta_0 p)(1 + \beta + \beta_0 + \beta \beta_0 p) \log \frac{2}{\gamma}}{\sqrt{n}}.$$

□

## E SOME CALCULATIONS ON RANDOM INITIALIZATION

### E.1 GAUSSIAN INITIALIZATION WITHOUT OFFSET

For Gaussian initialization  $\xi = (\xi_1, \dots, \xi_p) \sim \mathcal{N}(0, I_p)$ , we have

$$\begin{aligned} \hat{\theta} &= \xi - \eta \left( \frac{n}{2} \cdot \frac{-e^{-\xi_1}}{1 + e^{-\xi_1}} \cdot \begin{bmatrix} -1 \\ 0 \\ \vdots \\ 0 \end{bmatrix} \right) + \frac{n}{2} \cdot \frac{-e^{-\xi_1}}{1 + e^{-\xi_1}} \cdot \begin{bmatrix} 1 \\ 0 \\ \vdots \\ 0 \end{bmatrix} + \mathcal{N}(0, \frac{G^2}{2\rho} I_p) \\ &= \xi + \eta \left( \frac{e^{-\xi_1}}{1 + e^{-\xi_1}} \cdot \begin{bmatrix} n \\ 0 \\ \vdots \\ 0 \end{bmatrix} + \mathcal{N}(0, \frac{G^2}{2\rho} I_p) \right) \end{aligned}$$

The sensitivity is  $\frac{e^{-\xi_1}}{1 + e^{-\xi_1}} < 1$ . Consider  $x = (-1, 0, \dots, 0)^T$ . We have

$$\widehat{\theta}^T x = -\xi_1 + \eta \left( -\frac{ne^{-\xi_1}}{1 + e^{-\xi_1}} \right) + \mathcal{N}(0, \frac{G^2}{2\rho}) =: \mu_{\xi_1, n} + \mathcal{N}(0, \frac{G^2}{2\rho}).$$

The mis-classification error is

$$\begin{aligned} \mathbb{P}[\widehat{\theta}^T x > 0] &= \mathbb{E}_{\xi_1 \sim \mathcal{N}(0,1)} \mathbb{P} \left[ \mathcal{N} \left( \mu_{\xi_1, n}, \frac{G^2}{2\rho} \right) > 0 \mid \xi_1 \right] \\ &= \mathbb{E}_{\xi_1 \sim \mathcal{N}(0,1)} \left[ \Phi \left( \frac{\sqrt{2\rho} \mu_{\xi_1, n}}{G} \right) \right] \end{aligned}$$

## E.2 GAUSSIAN INITIALIZATION WITH OFF-SET

Denote  $x_1 = -e_1 + v$  and  $x_2 = e_1 + v$  with  $\|v\|_\infty \leq \beta$ . For the logistic loss  $\ell(y, \theta^T x) = \log(1 + e^{-y\theta^T x})$ , we have

$$g(\theta, y \cdot x) := \nabla_\theta \ell(y, \theta^T x) = \frac{e^{-y\theta^T x}}{1 + e^{-y\theta^T x}} (-yx).$$

Denote

$$g_1(\theta) = g(\theta, -1 \cdot x_1) = \frac{e^{\theta^T x_1}}{1 + e^{\theta^T x_1}} x_1$$

and

$$g_2(\theta) = g(\theta, 1 \cdot x_2) = \frac{e^{-\theta^T x_2}}{1 + e^{-\theta^T x_2}} (-x_2).$$

If we shift the feature by some vector  $v$ , then the loss function is

$$R_n = \frac{n}{2} \log(1 + e^{\theta^T x_1}) + \frac{n}{2} \log(1 + e^{-\theta^T x_2}).$$

And the gradient is

$$\nabla_\theta R_n(\theta) = \frac{n}{2} (g_1(\theta) + g_2(\theta)).$$

Thus, the output of one-step NoiseGD is given by

$$\hat{\theta} = \theta_0 - \frac{\eta n}{2} [g_1(\theta_0) + g_2(\theta_0) + \mathcal{N}(0, \sigma^2)].$$

Let  $\mu_\xi = \xi - \frac{\eta n}{2} [g_1(\xi) + g_2(\xi)]$ . Then, we have

$$\mu_\xi^T e_1 = \xi_1 - \frac{\eta n e^{\xi^T x_1}}{2 + 2e^{\xi^T x_1}} (-1 + v_1) + \frac{\eta n e^{\xi^T x_2}}{2 + 2e^{\xi^T x_2}} (1 + v_1).$$

And the mis-classification error is

$$\mathbb{E}_\xi \left( \Phi \left( -\frac{\sqrt{2\rho} \mu_\xi^T e_1}{G} \right) \right).$$
